# Supplementary material
Source: publisher figshare collection journal article supplement (https://frontiersin.figshare.com/ndownloader/files/31083343)
Supplement: Supplementary file [file 31083343]

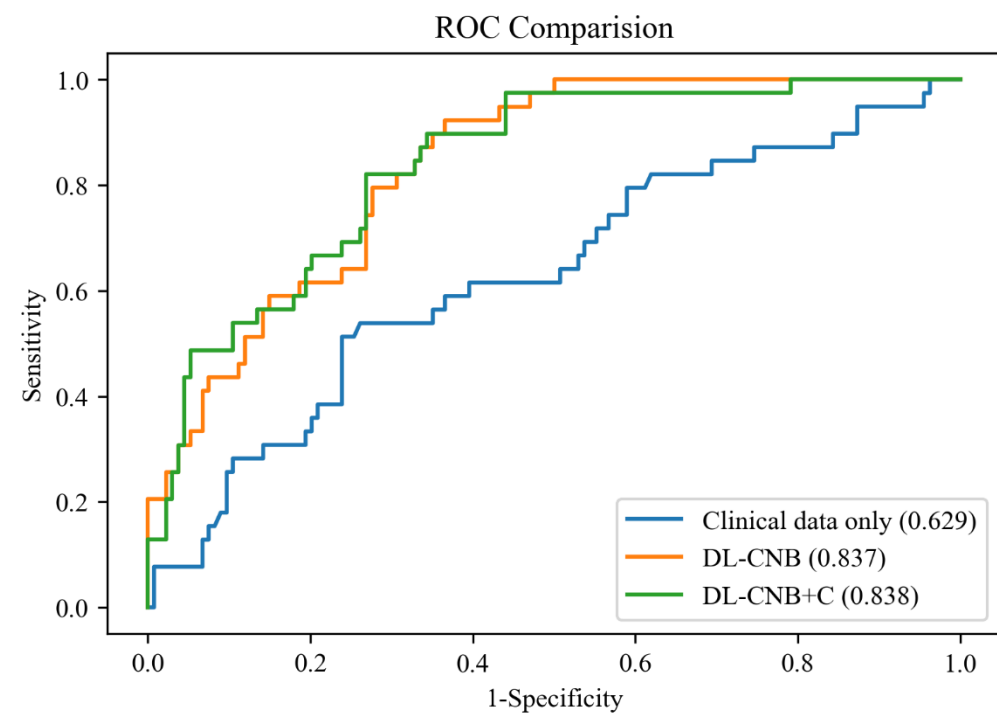

Figure 2. Comparison of receiver operating characteristic (ROC) curves between different models for predicting disease-free axilla (N0) and heavy metastatic burden of axillary disease (N+( $\geq 3$ )). Numbers in parentheses are AUCs.
